# Supplementary material
Source: Research Square preprint supplement (doi:10.21203/rs.3.rs-9163171/v1)
Supplement: Supplementary file 1 [file 423f0e228b33431f13e99a8d.docx]

**Table 1.** In vitro antistaphylococcal, anti-enterococcal, antimycobacterial activities (MIC [μM]) and in vitro cell viability (IC50 [µM] ± SD, *n* = 6) on human cell lines compared to clinically used drugs.

| **No.** | **R** | **logP1** | **σ1** | **MIC [µM]** | | | | | | | | | | | **IC50 [µM] [53,54]** | | |
| --- | --- | --- | --- | --- | --- | --- | --- | --- | --- | --- | --- | --- | --- | --- | --- | --- | --- |
| **SA** | **MRSA1** | **MRSA2** | **MRSA3** | **EF** | **MT** | **MS** | **MK** | **CA** | **CK** | **CP** | **HCT 116 p53+/+** | **HCT 116 p53-/-** | **NHDF** |
|  | | | | | | | | | | | | | | | | | |
| **A1** | 2-OMe | 4.04 | 0.10 | >803 | 803 | >803 | 803 | >803 | 401 | 401 | 401 | 401 | 401 | 401 | 13.13 ± 1.98 | 13.44 ± 1.39 | >25 |
| **A2** | 3-OMe | 4.02 | 0.66 | >803 | 803 | 803 | 803 | >803 | **3.13** | **3.13** | **3.13** | 201 | 201 | 201 | 9.70 ± 0.46 | 10.35 ± 0.84 | >25 |
| **A3** | 4-OMe | 4.01 | 0.36 | >803 | 100 | >803 | 201 | >803 | 401 | 401 | 803 | 201 | 201 | 401 | 11.65 ± 0.73 | 11.16 ± 1.13 | >25 |
| **A4** | 2-OEt | 4.40 | 0.01 | >769 | 769 | >769 | >769 | >769 | 384 | 769 | 384 | 384 | 384 | 384 | 20.26 ± 4.44 | 19.76 ± 1.16 | >25 |
| **A5** | 4-OEt | 4.37 | 0.36 | >769 | 769 | >769 | >769 | >769 | 384 | >769 | >769 | 384 | 384 | 384 | 20.87 ± 0.84 | 15.48 ± 1.42 | >25 |
| **A6** | 4-OAc | 3.87 | 0.47 | >738 | 738 | >738 | 738 | >738 | 369 | 105 | 184 | 92.2 | 92.2 | 184 | >25 | >25 | >25 |
| **A7** | 2-Cl | 4.46 | 1.05 | 396 | 396 | 396 | 396 | >793 | 49.5 | 49.5 | 6.19 | 198 | 198 | 198 | 10.63 ± 0.41 | 8.86 ± 0.83 | >25 |
| **A8** | 3-Cl | 4.58 | 0.85 | 396 | 396 | 198 | 396 | >793 | 793 | >793 | 396 | 198 | 198 | 198 | 14.47 ± 0.68 | 10.87 ± 1.71 | >25 |
| **A9** | 2-NO2 | 3.78 | 1.12 | >766 | >766 | >766 | 766 | >766 | 192 | >766 | >766 | **12.0** | **12.0** | **12.0** | 4.60 ± 0.22 | 4.54 ± 0.31 | >25 |
| **A10** | 3,4-OMe | 3.51 | 0.53 | 45.8 | 91.7 | 91.7 | 45.8 | 734 | 367 | >734 | >734 | 367 | 367 | 367 | 16.84 ± 0.44 | 14.74 ± 0.56 | >25 |
| **A11** | 3,5-OMe | 4.28 | 0.93 | >734 | 734 | >734 | 734 | >734 | 367 | 734 | 734 | 367 | 367 | 734 | >25 | >25 | ND |
| **A12** | 2,3-Cl | 5.22 | 1.22 | >715 | >715 | >715 | >715 | >715 | 715 | >715 | 715 | >715 | >715 | >715 | >25 | 9.38 ± 0.87 | >25 |
| **A13** | 2,6-Cl | 5.20 | 1.33 | **2.79** | **1.40** | **2.79** | **2.79** | >715 | 5.59 | 11.2 | 11.2 | 22.4 | 22.4 | 22.4 | >25 | >25 | ND |
| **A14** | 2-Cl-6-F | 4.46 | 1.39 | 751 | >751 | >751 | >751 | >751 | 375 | 751 | 751 | >751 | >751 | >751 | >25 | >25 | ND |
| **A15** | 2,4-NO2 | 3.76 | 1.66 | >675 | >675 | >675 | >675 | >675 | 338 | >675 | >675 | >675 | >675 | >675 | >25 | >25 | ND |
|  | | | | | | | | | | | | | | | | | |
| **B1** | 4-OH | 3.41 | 0.64 | 122 | 122 | 122 | 122 | >973 | 487 | 487 | 60.8 | 122 | 243 | 243 | 13.53 ± 1.76 | 16.61 ± 1.59 | >25 |
| **B2** | 2-OAc | 3.35 | 0.06 | 105 | >839 | >839 | 839 | >839 | 420 | 210 | 105 | 105 | 210 | 420 | 7.32 ± 1.01 | 13.53 ± 0.81 | 6.92 ± 1.72 |
| **B3** | 3-Cl | 4.56 | 0.85 | 911 | 911 | 911 | 911 | >911 | >911 | >911 | >911 | >911 | >911 | >911 | ND | ND | ND |
| **B4** | 2-NO2 | 3.64 | 1.12 | 438 | 877 | 877 | >877 | >877 | 219 | >877 | >877 | **13.7** | **13.7** | **13.7** | 11.72 ± 0.45 | 2.61 ± 0.35 | >25 |
| **B5** | 3,5-OMe | 3.93 | 0.93 | 13.0 | 13.0 | 26.1 | 6.51 | >834 | 104 | >834 | >834 | 104 | 104 | 417 | >25 | 19.28 ± 1.15 | >25 |
| **B6** | 2,6-Cl | 5.04 | 1.33 | **3.16** | **3.16** | **3.16** | **3.16** | >810 | **6.33** | **6.33** | **6.33** | 25.3 | 25.3 | 25.3 | >25 | >25 | ND |
| **B7** | 2-OAc-4-Cl | 4.24 | 0.20 | 47.2 | 94.4 | 189 | 189 | >755 | 378 | >755 | 94.4 | 372 | 378 | 378 | 19.92 ± 0.50 | 18.61 ± 1.23 | >25 |
|  | | | | | | | | | | | | | | | | | |
| **C1** | 2-Cl | 6.17 | 1.05 | 81.6 | 327 | 327 | 81.6 | >653 | 20.4 | 20.4 | 10.2 | 327 | 163 | 327 | 2.22 ± 0.27 | 1.30 ± 0.13 | >25 |
| **C2** | 2-I | 6.61 | 0.91 | 132 | 132 | 132 | 132 | >529 | 264 | >529 | >529 | 132 | 132 | 132 | 1.20 ± 0.16 | 2.40 ± 0.56 | 15.39 ± 0.74 |
| **C3** | 2-CN | 5.32 | 1.04 | 20.9 | 20.9 | 20.9 | 41.8 | >668 | 167 | >668 | >668 | >668 | >668 | >668 | 0.93 ± 0.12 | 1.08 ± 0.11 | >25 |
| **C4** | 3-CN | 5.30 | 0.92 | 334 | >668 | >668 | 334 | >668 | >668 | >668 | >668 | 83.6 | 83.6 | 167 | 1.39 ± 0.18 | 1.47 ± 0.50 | 11.15 ± 2.53 |
| **C5** | 4-CN | 5.39 | 1.05 | >668 | >668 | >668 | 334 | >668 | 20.9 | 9.93 | 41.8 | >668 | >668 | >668 | 1.78 ± 0.53 | 1.92 ± 0.19 | 20.00 ± 1.04 |
| **C6** | 2-NO2 | 5.27 | 1.12 | 4.96 | 19.9 | 9.93 | 2.48 | >635 | 318 | >635 | >635 | **9.93** | **9.93** | **9.93** | 0.85 ± 0.11 | 0.78 ± 0.13 | 22.29 ± 1.01 |
| **C7** | 3-NO2 | 5.48 | 1.09 | 159 | 318 | 318 | 159 | >635 | 318 | >635 | >635 | 79.4 | 159 | 318 | 1.74 ± 0.10 | 1.01 ± 0.07 | 11.09 ± 0.35 |
| **C8** | 4-NO2 | 5.40 | 1.14 | >635 | >635 | >635 | >635 | >635 | 79.4 | >635 | >635 | >635 | >635 | >635 | 2.31 ± 0.30 | 2.01 ± 0.53 | 19.94 ± 1.98 |
| **C9** | 2,5-F | 5.76 | 1.24 | >650 | >650 | >650 | >650 | >650 | 81.2 | >650 | >650 | 325 | 325 | 325 | 2.57 ± 0.37 | 4.47 ± 1.00 | 20.38 ± 0.89 |
| **C10** | 2,6-F | 5.78 | 1.44 | 20.3 | 40.6 | 81.2 | 40.6 | >650 | 650 | >650 | >650 | 325 | 325 | 325 | 4.93 ± 0.25 | 4.49 ± 0.51 | >25 |
| **C11** | 2,6-Cl | 7.10 | 1.33 | **2.34** | **2.34** | **2.34** | **2.34** | >600 | **4.68** | **4.68** | **4.68** | 18.7 | 18.7 | 18.7 | 5.93 ± 0.70 | 6.06 ± 0.96 | 9.55 ± 1.58 |
| **C12** | 2-Cl-6-F | 6.16 | 1.39 | 156 | 312 | 312 | 312 | >624 | 312 | 624 | 624 | >624 | >624 | >624 | 3.41 ± 0.36 | 2.73 ± 0.37 | 23.46 ± 1.44 |
| **C13** | 2-Br-6-F | 6.73 | 1.39 | 141 | 141 | 281 | 141 | >563 | 281 | >563 | >563 | >563 | >563 | >563 | 3.70 ± 0.38 | 2.90 ± 0.28 | >25 |
| **C14** | 2,4-NO2 | 5.10 | 1.66 | 286 | >571 | >571 | >571 | >571 | 35.7 | >571 | >571 | >571 | >571 | >571 | **0.28 ± 0.04** | **0.27 ± 0.03** | 14.59 ± 0.81 |
| **C15** | 2-OAc-5-Cl | 6.18 | 0.18 | 71.1 | 71.1 | 142 | 71.1 | >569 | 284 | 66.1 | >569 | 284 | 284 | 284 | 13.85 ± 0.59 | 11.46 ± 0.50 | >25 |
| **C16** | 2-OAc-3-NO2 | 5.41 | 1.39 | 278 | 555 | 278 | 278 | >555 | 555 | >555 | >555 | 139 | 139 | 278 | 2.71 ± 0.16 | 2.61 ± 0.33 | 20.23 ± 1.27 |
| **C17** | 2-OAc-5-NO2 | 5.37 | 1.39 | 139 | 555 | 555 | 278 | >555 | 139 | >555 | >555 | 278 | 278 | 278 | 4.76 ± 0.47 | 3.60 ± 0.70 | 22.16 ± 0.77 |
| **C18** | 3-NO2-4-OAc | 5.47 | 1.37 | 69.4 | 139 | 139 | 278 | >555 | 278 | >555 | >555 | 69.4 | 69.4 | 139 | 4.22 ± 0.32 | 4.52 ± 0.16 | >25 |
| **C19** | 2-OAc-3,5-Cl | 6.97 | 0.31 | >528 | >528 | >528 | >528 | >528 | >528 | >528 | >528 | >528 | >528 | >528 | 3.65 ± 0.22 | 4.72 ± 0.26 | 13.83 ± 0.46 |
| **C20** | 2-OAc-3,5-I | 7.11 | 0.27 | >383 | >383 | >383 | >383 | >383 | >383 | >383 | >383 | >383 | >383 | >383 | 5.13 ± 0.27 | 3.90 ± 0.16 | 13.09 ± 0.75 |
| **C21** | 2-OAc-3-Br-5-Cl | 6.95 | 0.31 | 242 | 242 | >484 | 484 | >484 | 242 | >484 | >484 | 60.5 | 121 | 60.5 | 3.83 ± 0.14 | 4.39 ± 0.23 | 13.36 ± 0.64 |
| **C22** | 2,6-F-3-Cl | 6.73 | 1.69 | >598 | >598 | >598 | >598 | >598 | 299 | >598 | >598 | >598 | >598 | >598 | 7.26 ± 0.36 | 4.82 ± 0.52 | 21.38 ± 2.21 |
| **C23** | 2,6-F-4-Cl | 6.53 | 1.59 | 299 | >598 | >598 | >598 | >598 | >598 | >598 | >598 | >598 | >598 | >598 | 20.90 ± 0.71 | 12.15 ± 1.86 | >25 |
|  | | | | | | | | | | | | | | | | | |
| **D1** | 2-CN | 5.65 | 1.04 | 5.87 | 11.7 | 11.7 | 2.93 | >751 | 167 | >751 | >751 | 93.8 | 93.8 | 375 | 0.86 ± 0.07 | 0.58 ± 0.08 | >25 |
| **D2** | 3-CN | 5.63 | 0.92 | 375 | 751 | >751 | 751 | >751 | 751 | >751 | >751 | 375 | 375 | 375 | 8.51 ± 0.77 | 5.28 ± 1.20 | 17.40 ± 0.85 |
| **D3** | 4-CN | 5.71 | 1.05 | 375 | 751 | >751 | >751 | >751 | 11.7 | 11.7 | 11.7 | 375 | 375 | 751 | 3.10 ± 0.04 | 2.46 ± 0.34 | 7.97 ± 0.55 |
| **D4** | 2-NO2 | 5.45 | 1.12 | 5.54 | 5.54 | 5.54 | 5.54 | >709 | 5.54 | 5.54 | 5.54 | 11.1 | 11.1 | 22.2 | **0.73 ± 0.12** | **0.54 ± 0.17** | >25 |
| **D5** | 3-NO2 | 5.67 | 1.09 | 88.6 | 177 | 177 | 177 | >709 | 709 | >709 | >709 | 44.3 | 88.6 | 177 | 2.77 ± 0.54 | 1.03 ± 0.32 | 9.82 ± 1.10 |
| **D6** | 4-NO2 | 5.59 | 1.14 | 355 | 709 | 709 | 709 | >709 | 709 | >709 | >709 | 177 | 88.6 | 88.6 | 6.48 ± 0.42 | 3.39 ± 0.35 | >25 |
| **D7** | 2,3-Cl | 7.04 | 1.22 | 41.6 | 83.1 | 83.1 | 41.6 | >665 | 665 | >665 | >665 | 41.6 | 83.1 | 166 | 5.27 ± 1.02 | 4.00 ± 0.37 | 4.50 ± 0.27 |
| **D8** | 2,6-Cl | 6.98 | 1.33 | 2.60 | **2.60** | **2.60** | **2.60** | >665 | 5.19 | 2.60 | 2.60 | **5.19** | **10.4** | **10.4** | 1.73±0.38 | 0.92±0.22 | 6.22±1.50 |
| **D9** | 2-Cl-6-F | 6.07 | 1.39 | 174 | 348 | 348 | 348 | >696 | 696 | >696 | >696 | 174 | 174 | 174 | 7.30 ± 1.02 | 4.50 ± 1.10 | >25 |
| **D10** | 2,4-NO2 | 5.33 | 1.66 | **2.46** | 4.93 | 4.93 | 9.85 | >631 | 4.93 | **2.46** | **2.46** | 19.7 | 19.7 | 19.7 | 0.75 ± 0.30 | 0.76 ± 0.16 | >25 |
| **D11** | 2-OH-5-Cl | 6.25 | 1.04 | >699 | 699 | >699 | >699 | >699 | 10.9 | 21.9 | 21.9 | 43.7 | 43.7 | 43.7 | >25 | >25 | >25 |
| **D12** | 2-OAc-5-Cl | 6.18 | 0.18 | 9.80 | 4.90 | 19.6 | 9.80 | >627 | **2.45** | 9.80 | 9.80 | 4.90 | 19.6 | 19.6 | 13.03±1.02 | 10.22±1.19 | >25 |
| **D13** | 2-OH-5-NO2 | 5.68 | 1.28 | 4.77 | 9.55 | 9.55 | 19.1 | >611 | 19.1 | 19.1 | 19.1 | 153 | 153 | 153 | 6.47±0.54 | 5.633±0.56 | >25 |
| **D14** | 3-NO2-4-OAc | 5.67 | 1.37 | 76.4 | 153 | 153 | 153 | >611 | 305 | >611 | >611 | 76.4 | 153 | 305 | 3.63 ± 0.14 | 3.28 ± 0.69 | 22.78 ± 0.97 |
| **D15** | 2-OAc-3,5-Cl | 6.96 | 0.31 | 289 | >578 | >578 | 578 | >578 | >578 | >578 | >578 | 144 | 144 | 144 | 4.09 ± 0.28 | 4.03 ± 0.34 | 16.99 ± 1.58 |
|  | | | | | | | | | | | | | | | | | |
| **E1** | 2-Cl | 4.87 | 1.05 | >911 | >911 | >911 | >911 | >911 | 456 | >911 | >911 | >911 | >911 | >911 | >25 | >25 | ND |
| **E2** | 2-NO2 | 4.06 | 1.12 | >877 | >877 | >877 | >877 | >877 | 438 | >877 | >877 | >877 | >877 | >877 | >25 | >25 | ND |
| **E3** | 2,3-Cl | 5.53 | 1.22 | >810 | >810 | >810 | >810 | >810 | 405 | >810 | >810 | >810 | >810 | >810 | >25 | >25 | ND |
| **E4** | 2,4-NO2 | 3.73 | 1.66 | >760 | >760 | >760 | >760 | >760 | 380 | >760 | >760 | >760 | >760 | >760 | >25 | >25 | ND |
| **AMP** | – | – | – | 5.72 | 45.9 | 45.9 | 45.9 | 11.5 | – | – | – | – | – | – | – | – | – |
| **CPX** | – | – | – | 0.755 | 48.3 | 48.3 | 48.3 | 3.02 | 48.3 | 0.388 | 3.025 | – | – | – | – | – | – |
| **RIF** | – | – | – | – | – | – | – | – | 9.77 | 19.4 | 0.156 | – | – | – | – | – | – |
| **APB** | – | – | – | – | – | – | – | – | – | – | – | 1.08 | 2.16 | 2.16 | – | – | – |
| **FC** | – | – | – | – | – | – | – | – | – | – | – | 7.75 | 124 | 3.88 | – | – | – |
| **DOX** | – | – | – | – | – | – | – | – | – | – | – | – | – | – | 0.34 ± 0.04 | 0.38 ± 0.03 | 0.14 ± 0.03 |
| **FU** | – | – | – | – | – | – | – | – | – | – | – | – | – | – | 4.42 ± 0.70 | 4.69 ± 0.33 | >25 |

1ACD/Percepta ver. 2012 (Advanced Chemistry Development. Inc., Toronto, ON, Canada, 2012); SA *= Staphylococcus aureus* ATCC 29213;MRSA1–3 *=* clinical isolates of methicillin-resistant *S. aureus* SA 3202, SA 630 (National Institute of Public Health, Prague, Czech Republic), and 63718 (Department of Infectious Diseases and Microbiology, Faculty of Veterinary Medicine, University of Veterinary Sciences Brno, Czech Republic); EF = *Enterococcus faecalis* ATCC 29213, MT = *Mycobacteium tuberculosis* H37Ra/ATCC 25177; MS = *Mycobacteium smegmatis* ATCC 700084, MK = *Mycobacteium kansasii* DSM 44162; CA = *Candida albicans* CCM 8361, CK = *Candida krusei* CCM 8271, CP = *Candida parapsilosis* CCM 8260; HCT 116 p53+/+ = colon cancer cell line wild-type; HCT 116 with p53-/- = colon cancer cell line; NHDF = normal human dermal fibroblasts; AMP = ampicillin; CPX = ciprofloxacin; RIF = rifampicin; APB = amphotericin B; FC = flucytosine; DOX = doxorubicin; FU = fluorouracil; ND = not determined. Color scale: green (<10 µM), yellow (10–20 µM), orange (20–100 µM), red (>100 µM). Bold indicates the most active compound for each strain for each series of compounds A-D.
