# Supplementary material
Source: Research Square preprint supplement (doi:10.21203/rs.3.rs-9163171/v1)
Supplement: Supplementary file 2 [file d9834482a723ec5b382568cc.docx]

**Characterization of compounds**

- 1. *General*

All of the reagents were purchased from Aldrich. Kieselgel 60, 0.040-0.063 mm (Merck, Darmstadt, Germany) was used for the column chromatography. TLC experiments were performed on alumina-backed silica gel 40 F254 plates (Merck, Darmstadt, Germany). The plates were illuminated under UV (254 nm) and evaluated in iodine vapor. The melting points were determined on an Optimelt MPA-100 apparatus (SRS, Stanford CA). The purity of the final compounds was checked using HPLC. Detection wavelengths of 210 and 250 nm were chosen for detection. The purity of individual compounds was determined from the area peaks in the chromatogram of the sample solution. All 1H and 13C NMR spectra were recorded on a Bruker Avance III 400 MHz FT-NMR spectrometer (400 MHz for 1H and 101/126 MHz for 13C, Bruker Comp., Karlsruhe, Germany). Chemical shifts are reported in ppm (δ) using signal of the solvent (DMSO-*d6,* CD2Cl2-*d2,* CDCl3-*d1*) as the reference against the internal standard Si(CH3)4. Easily exchangeable signals were omitted when they were diffuse. Signals are designated as follows: s, singlet; br. s, broad singlet; d, doublet; dd, doublet of doublets; ddd, doublet of doublet of doublets; t, triplet; tt, triplet of triplets; td, triplet of doublets; q, quartet; m, multiplet. Mass spectra were measured using a LTQ Orbitrap Hybrid Mass Spectrometer (Thermo Electron Corporation, USA) with direct injection into an APCI source (400°C) in the positive mode. All yields are unoptimized and generally represent the result of a single experiment.

*1.2. Synthesis of compounds*

*Method 1:* The appropriate quinoline derivative (2.5 mmol) in acetic anhydride with 80% acetic acid was thoroughly mixed with one equivalent aldehyde (2.5 mmol) and heated in an inert gas atmosphere (N2) for 18-22 h at 130 °C. Then, the mixture was evaporated to dryness and a solid was crystallized from ethanol, methanol or ethyl acetate.

*Method 2:* The crude product from the first step was transferred to a mixture of pyridine and water at a ratio of 3:1 and further heated for 3 h at 100°C. Then, the mixture was evaporated to dryness and a solid was crystallized from ethanol, methanol or ethyl acetate.

*Method 3:* The appropriate styrylquinoline derivative (2.5 mmol) in methanol was thoroughly mixed with 2.5 equivalent K2CO3 for 2 h at room temperature. Then, concentrated HCl was added and the resulting precipitate was filtered and washed with H2O. The crude product was recrystallized from ethanol, methanol or ethyl acetate.

**(E)-2-[2-(2-methoxyphenyl)vinyl]quinolin-8-yl acetate (A1).** Method 1; Yield 12 %; Mp. 120-121 °C.[1]

**(E)-2-[2-(3-methoxyphenyl)vinyl]quinolin-8-yl acetate** (**A2**). Method 1; Yield 14 %; Mp. 94-97 °C.[1]

**(E)-2-[2-(4-methoxyphenyl)vinyl]quinolin-8-yl acetate (A3)**. Method 1; Yield 20 %; Mp. 97-100 °C.[1]

**(E)-2-[2-(2-ethoxyphenyl)vinyl]quinolin-8-yl acetate** (**A4**). Method 1; Yield 30 %; Mp. 114-115 °C.[1]

**(E)-2-[2-(4-ethoxyphenyl)vinyl]quinolin-8-yl acetate** (**A5**). Method 1; Yield 27 %; Mp. 105-108 °C.[1]

**(E)-2-[2-(4-Acetoxyphenyl)vinyl]quinolin-8-yl acetate** (**A6**). Method 1; Yield 67 %; Mp. 157-159 °C.[1]

**(E)-2-[2-(2-chlorophenyl)vinyl]quinolin-8-yl acetate** (**A7**). Method 1; Yield 68 %; Mp. 130-131 °C.[1]

**(E)-2-[2-(3-chlorophenyl)vinyl]quinolin-8-yl acetate** (**A8**). Method 1; Yield 46 %; Mp. 70-72 °C.[1]

**(E)-2-[2-(2-nitrophenyl)vinyl]quinolin-8-yl acetate** (**A9**). Method 1; Yield 73 %; Mp. 120-122 °C.[1]

**(E)-2-[2-(3,4-dimethoxyphenyl)vinyl]quinolin-8-yl acetate** (**A10**). Method 1; Yield 11 %; Mp. 120-122 °C.[1]

**(E)-2-[2-(3,5-dimethoxyphenyl)vinyl]quinolin-8-yl acetate** (**A11**). Method 1; Yield 13 %; Mp. 103-105 °C.[1]

**(E)-2-[2-(2,3-dichlorophenyl)vinyl]quinolin-8-yl acetate** (**A12**). Method 1; Yield 77 %; Mp. 143-144 °C.[1]

**(E)-2-[2-(2,6-dichlorophenyl)vinyl]quinolin-8-yl acetate** (**A13**). Method 1; Yield 69 %; Mp. 117-120 °C.[1]

**(E)-2-[2-(2-chloro-6-fluoro)vinyl]quinolin-8-yl acetate (A14).** Method 1; Yield: 82 %.[2]

**(E)-2-[2-(2,4-dinitrophenyl)vinyl]quinolin-8-yl acetate** (**A15**). Method 1; Yield 75 %; Mp. 252-254 °C.[1]

**(E)-2-[2-(4-hydroxyphenyl)vinyl]quinolin-8-ol** (**B1**). Method 1 and then method 3; Yield 63 %; Mp. 156-157 °C.[1]

**(E)-2–[2-(2-Acetoxyphenyl)vinyl]quinolin-8-ol (B2).** Method 2; Yield 28 %; Mp. 128 °C.[1]

**(E)-2-[2-(3-chloro-phenyl)vinyl]quinolin-8-ol (B3).** Method 2; Yield 40 %; Mp. 120-123 °C.[3]

**(E)-2-[2-(2-nitrophenyl)vinyl]quinolin-8-ol** (**B4**). Method 2; Yield 49 %; Mp. 145-147 °C.[1]

**(E)-2-[2-(3,5-dimethoxyphenyl)vinyl]quinolin-8-ol** (**B5**). Method 2; Yield 19 %; Mp. 102-105 °C.[1]

**(E)-2-[2-(2,6-dichlorophenyl)vinyl]quinolin-8-ol** (**B6**). Method 2; Yield 76 %; Mp. 127-129 °C.[1]

**(E)-2-[2-(2-acetoxy-5-chlorophenyl)vinyl]quinolin-8-ol** (**B7**). Method 2; Yield 30 %; Mp. 146-148 °C.[1]

**(E)-5,7-dichloro-2-[2-(2-chlorophenyl)vinyl]-quinolin-8-yl acetate** (**C1**). Method 1; Yield 44 %; Mp. 178-181 °C.[1]

**(E)-5,7-dichloro-2-[2-(2-iodophenyl)vinyl]-quinolin-8-yl acetate** (**C2**). Method 1; Yield 32 %; Mp. 171-174 °C.[1]

**(E)-5,7-dichloro-2-[2-(2-cyanophenyl)vinyl]-quinolin-8-yl acetate** (**C3**). Method 1; Yield 83 %; Mp. 196-198 °C.[1]

**(E)-5,7-dichloro-2-[2-(3-cyanophenyl)vinyl]-quinolin-8-yl acetate** (**C4**). Method 1; Yield 52 %; Mp. 184-187 °C.[1]

**(E)-5,7-dichloro-2-[2-(4-cyanophenyl)vinyl]-quinolin-8-yl acetate** (**C5**). Method 1; Yield 49 %; Mp. 191-194 °C.[1]

**(E)-5,7-dichloro-2-[2-(2-nitrophenyl)vinyl]-quinolin-8-yl acetate** (**C6**). Method 1; Yield 39 %; Mp. 160-161 °C.[1]

**(E)-5,7-dichloro-2-[2-(3-nitrophenyl)vinyl]-quinolin-8-yl acetate** (**C7**). Method 1; Yield 70 %; Mp. 210-214 °C.[1]

**(E)-5,7-dichloro-2-[2-(4-nitrophenyl)vinyl]-quinolin-8-yl acetate** (**C8**). Method 1; Yield 72 %; Mp. 234-237 °C.[1]

**(E)-5,7-dichloro-2-[2-(2,5-difluorophenyl)vinyl]-quinolin-8-yl acetate** (**C9**). Method 1; Yield 70 %; Mp. 191-192 °C.[1]

**(E)-5,7-dichloro-2-[2-(2,6-difluorophenyl)vinyl]-quinolin-8-yl acetate** (**C10**). Method 1; Yield 40 %; Mp. 112-114 °C.[1]

**(E)-5,7-dichloro-2-[2-(2,6-dichlorophenyl)vinyl]-quinolin-8-yl acetate** (**C11**). Method 1; Yield 41 %; Mp. 182-185 °C.[1]

**(E)-5,7-dichloro-2-[2-(2-chloro-6-fluorophenyl)vinyl]-quinolin-8-yl acetate** (**C12**). Method 1; Yield 44 %; Mp. 188-190 °C.[1]

**(E)-5,7-dichloro-2-[2-(2-bromo-6-fluorophenyl)vinyl]-quinolin-8-yl acetate** (**C13**). Method 1; Yield 78 %; Mp. 201-204 °C.[1]

**(E)-5,7-dichloro-2-[2-(2,4-dinitrophenyl)vinyl]-quinolin-8-yl acetate** (**C14**). Method 1; Yield 91 %; Mp. 242-244 °C.[1]

**(E)-5,7-dichloro-2-[2-(2-acetoxy-5-chlorophenyl)vinyl]-quinolin-8-yl acetate** (**C15**). Method 1; Yield 63 %; Mp. 182-185 °C.[1]

**(E)-5,7-dichloro-2-[2-(2-acetoxy-3-nitrophenyl)vinyl]-quinolin-8-yl acetate** (**C16**). Method 1; Yield 70 %; Mp. 257-258 °C.[1]

**(E)-5,7-dichloro-2-[2-(2-acetoxy-5-nitrophenyl)vinyl]-quinolin-8-yl acetate** (**C17**). Method 1; Yield 56 %; Mp. 213-215 °C.[1]

**(E)-5,7-dichloro-2-[2-(4-acetoxy-3-nitrophenyl)vinyl]-quinolin-8-yl acetate** (**C18**). Method 1; Yield 59 %; Mp. 231-233 °C.[1]

**(E)-5,7-dichloro-2-[2-(2-acetoxy-3,5-dichlorophenyl)vinyl]-quinolin-8-yl acetate** (**C19**). Method 1; Yield 88 %; Mp. 234-236 °C.[1]

**(E)-5,7-dichloro-2-[2-(2-acetoxy-3,5-dichlorophenyl)vinyl]-quinolin-8-yl acetate** (**C20**). Method 1; Yield 84 %; Mp. 259-262 °C.[1]

**(E)-5,7-dichloro-2-[2-(2-acetoxy-3-bromo-5-chlorophenyl)vinyl]-quinolin-8-yl acetate** (**C21**). Method 1; Yield 87 %; Mp. 238-239 °C.[1]

**(E)-5,7-dichloro-2-[2-(3-chloro-2,6-difluorophenyl)vinyl]-quinolin-8-yl acetate** (**C22**). Method 1; Yield 73 %; Mp. 116-117 °C.[1]

**(E)-5,7-dichloro-2-[2-(4-chloro-2,6-difluorophenyl)vinyl]-quinolin-8-yl acetate** (**C23**). Method 1; Yield 84 %; Mp. 127-129 °C.[1]

**(E)-5,7-dichloro-2-[2-(2-cyanophenyl)vinyl]-quinolin-8-ol** (**D1**). Method 2; Yield 69 %; Mp. 201-202 °C.[1]

**(E)-5,7-dichloro-2-[2-(3-cyanophenyl)vinyl]-quinolin-8-ol** (**D2**). Method 2; Yield 56 %; Mp. 258-260 °C.[1]

**(E)-5,7-dichloro-2-[2-(4-cyanophenyl)vinyl]-quinolin-8-ol** (**D3**). Method 2; Yield 46 %; Mp. 240-243 °C.[1]

**(E)-5,7-dichloro-2-[2-(2-nitrophenyl)vinyl]-quinolin-8-ol** (**D4**). Method 2; Yield 52 %; Mp. 215-217 °C.[1]

**(E)-5,7-dichloro-2-[2-(3-nitrophenyl)vinyl]-quinolin-8-ol** (**D5**). Method 2; Yield 70 %; Mp. 245-246 °C.[1]

**(E)-5,7-dichloro-2-[2-(4-nitrophenyl)vinyl]-quinolin-8-ol** (**D6**). Method 2; Yield 66 %; Mp. 269-271 °C.[1]

**(E)-5,7-dichloro-2-[2-(2,3-dichlorophenyl)vinyl]-quinolin-8-ol** (**D7**). Method 2; Yield 49 %; Mp. 208-210 °C.[1]

**(E)-5,7-dichloro-2-[2-(2,6-dichlorophenyl)vinyl]-quinolin-8-ol (D8)** Method 2; Yield 90%; Mp. 239 °C **1H NMR** (500 MHz, DMSO-*d*6) δ 10.72 (s, 1H), 8.78 (d, *J* = 2.3 Hz, 1H), 8.56 (dd, *J* = 8.6, 2.4 Hz, 1H), 8.52 (d, *J* = 8.7 Hz, 1H), 8.46 (d, *J* = 15.8 Hz, 1H), 8.26 (d, *J* = 8.7 Hz, 1H), 7.96 (d, *J* = 8.7 Hz, 1H), 7.80 (s, 1H), 7.72 (d, *J* = 15.7 Hz, 1H); **13C NMR** (126 MHz, DMSO) δ 154.00, 149.45, 148.52, 147.15, 139.21, 137.43, 135.38, 134.35, 130.53, 129.34, 128.38, 127.97, 124.63, 123.61, 120.67, 119.59, 116.25; **HR-MS**: calculated for C17H9Cl4NO [M+H]+383.95110 *m/z*, found 383.95197 *m/z*.

**(E)-5,7-dichloro-2-[2-(2-chloro-6-fluorophenyl)vinyl]-quinolin-8-ol** (**D9**). Method 2; Yield 41 %; Mp. 218-219 °C.[1]

**(E)-5,7-dichloro-2-[2-(2,4-dinitrophenyl)vinyl]-quinolin-8-ol** (**D10**). Method 2; Yield 99 %; Mp. 228-230 °C.[1]

**(E)-5,7-dichloro-2-[2-(2-hydroxy-5-chlorophenyl)vinyl]-quinolin-8-ol (D11)** Method 1 and then method 3; Yield 89 %; Mp. 240 °C; **1H NMR** (500 MHz, DMSO-*d*6) δ 10.40 (s, 1H), 8.44 (d, *J* = 8.7 Hz, 1H), 8.23 (d, *J* = 16.2 Hz, 1H), 7.93 (d, *J* = 8.7 Hz, 1H), 7.73 (s, 1H), 7.69 – 7.59 (m, 2H), 7.23 (dd, *J* = 8.7, 2.6 Hz, 1H), 6.96 (d, *J* = 8.7 Hz, 1H); **13C NMR** (126 MHz, DMSO) δ 156.07, 155.53, 149.12, 139.29, 133.73, 131.54, 129.83, 129.15, 128.29, 127.40, 125.23, 124.06, 123.49, 122.57, 119.63, 118.22, 116.00; **HR-MS**: calculated for C17H10Cl3NO2 [M+H]+ 365.9849 *m/z* found 365.9850 *m/z*.

**(E)-5,7-dichloro-2-[2-(2-acetoxy-5-chlorophenyl)vinyl]-quinolin-8-ol** **(D12)** Method 2 (reaction time was reduced to 1 h); Yield 84 %; Mp. 208 °C; **1H NMR** (500 MHz, DMSO-*d*6) δ 10.62 (s, 1H), 8.49 (d, *J* = 8.7 Hz, 1H), 8.16 (d, *J* = 16.2 Hz, 1H), 8.00 (d, *J* = 2.6 Hz, 1H), 7.93 (d, *J* = 8.7 Hz, 1H), 7.77 (s, 1H), 7.64 (d, *J* = 16.1 Hz, 1H), 7.49 (dd, *J* = 8.7, 2.6 Hz, 1H), 7.28 (d, *J* = 8.6 Hz, 1H), 2.44 (s, 3H); **13C NMR** (126 MHz, DMSO-*d*6) δ 169.89, 154.89, 149.27, 147.94, 139.31, 134.09, 131.36, 131.12, 131.10, 129.86, 128.55, 127.87, 127.11, 125.90, 124.42, 123.68, 119.63, 116.20, 21.43; **HR-MS**: calculated for C19H12Cl3NO3 [M+H]+ 407.9956 *m/z* found 407.9968 *m/z*.

**(E)-5,7-dichloro-2-[2-(2-hydroxy-5-nitrophenyl)vinyl]-quinolin-8-ol (D13)** Method 1 and then method 3; Yield; Mp. 221 °C; **1H NMR** (500 MHz, DMSO) δ 11.85 (s, 1H), 8.54 (d, *J* = 2.8 Hz, 1H), 8.48 (d, *J* = 8.8 Hz, 1H), 8.35 (d, *J* = 16.3 Hz, 1H), 8.13 (dd, *J* = 9.0, 2.9 Hz, 1H), 8.00 (d, *J* = 8.8 Hz, 1H), 7.82 – 7.75 (m, 2H), 7.13 (d, *J* = 9.0 Hz, 1H); **13C NMR** (126 MHz, DMSO-*d*6) δ 162.68, 155.68, 149.21, 140.34, 139.22, 133.79, 131.11, 130.41, 127.57, 125.91, 125.37, 124.15, 124.11, 122.81, 119.56, 116.98, 115.95; **HR-MS**: calculated for C17H10Cl2N2O4 [M+H]+ 377.00904 *m/z* found 377.00977 *m/z*.

**(E)-5,7-dichloro-2-[2-(4-acetoxy-3-nitrophenyl)vinyl]-quinolin-8-ol** (**D14**). Method 2; Yield 55 %; Mp. 261-263 °C.[1]

**(E)-5,7-dichloro-2-[2-(2-acetoxy-3,5-dichlorophenyl)vinyl]-quinolin-8-ol** (**D15**). Method 2; Yield 87 %; Mp. 269-270 °C.[1]

**(E)-2-[2-(2-chlorophenyl)vinyl]-quinolin-4-ol** (**E1**). Method 2; Yield 59 %; Mp. 336-338 °C.[1]

**(E)-2-[2-(2-nitrophenyl)vinyl]-quinolin-4-ol (E2).** Method 2; Yield 66 %; Mp. 330-332 °C 1H NMR (500 MHz, DMSO-*d*6) δ 11.51 (s, 1H), 8.07 (dd, *J* = 13.3, 4.9 Hz, 2H), 7.96 (d, *J* = 7.7 Hz, 1H), 7.88 (d, *J* = 16.3 Hz, 1H), 7.83 (t, *J* = 7.4 Hz, 1H), 7.72 – 7.62 (m, 3H), 7.33 (dt, *J* = 7.9, 3.9 Hz, 1H), 7.13 (d, *J* = 16.3 Hz, 1H), 6.41 – 6.30 (m, 1H); **13C NMR** (126 MHz, DMSO-*d6*) δ 177.67, 148.75, 146.48, 140.73, 134.22, 132.48, 130.96, 130.47, 129.83, 129.22, 127.68, 125.74, 125.27, 125.06, 123.62, 118.74, 109.07; **HR-MS**: calculated for C17H12N2O3 [M-H]- 291.07752 *m/z* found 291.07822 *m/z*.

**(E)-2-[2-(2,3-dichlorophenyl)vinyl]-quinolin-4-ol** (**E3**). Method 2; Yield 98 %; Mp. 348-349 °C.[1]

**(E)-2-[2-(2,4-dinitrophenyl)vinyl]-quinolin-4-ol** (**E4**). Method 2; Yield 92 %; Mp. 341-343 °C.[1]

**References**

1. Mrozek-Wilczkiewicz, A.; Kuczak, M.; Malarz, K.; Cieślik, W.; Spaczyńska, E.; Musiol, R. The synthesis and anticancer activity of 2-styrylquinoline derivatives. A p53 independent mechanism of action. *Eur J Med Chem* **2019**, *177*, 338-349, doi:10.1016/j.ejmech.2019.05.061.

2. Xiong, J.; Li, Z.; Ji, S.; Pan, C.; Ji, W.; Li, Q.; Huo, Y. Recyclable fluorescent chemodosimeters based on 8-hydroxyquinoline derivatives for highly sensitive and selective detection of mercury(II) in aqueous media and test strips. *Spectrochim Acta A Mol Biomol Spectrosc* **2019**, *218*, 196-205, doi:10.1016/j.saa.2019.04.004.

3. Majerz-Maniecka, K.; Musiol, R.; Nitek, W.; Oleksyn, B.J.; Mouscadet, J.F.; Le Bret, M.; Polanski, J. Intermolecular interactions in the crystal structures of potential HIV-1 integrase inhibitors. *Bioorg Med Chem Lett* **2006**, *16*, 1005-1009, doi:10.1016/j.bmcl.2005.10.083.
